# Supplementary material for: Druggable transcriptomic pathways revealed in Parkinson’s patient-derived midbrain neurons
Source: PubMed Central journal article supplement (PMC9579158; doi:10.1038/s41531-022-00400-0), 2022-10-18
Supplement: 41531_2022_400_MOESM1_ESM.pdf [file 41531_2022_400_MOESM1_ESM.pdf]

# ***Supplementary Figures 1 - 2***

## **Druggable transcriptomic pathways revealed in Parkinson's patient-derived midbrain neurons**

Mark van den Hurk<sup>1</sup>, Shong Lau<sup>2</sup>, Maria C. Marchetto<sup>2</sup>, Jerome Mertens<sup>2,3</sup>, Shani Stern<sup>2,4</sup>, Olga Corti<sup>5</sup>, Alexis Brice<sup>5</sup>, Beate Winner<sup>6,7,8</sup>, Jürgen Winkler<sup>6,7,8</sup>, Fred H. Gage<sup>2</sup> and Cedric Bardy<sup>1,9,\*</sup>

<sup>1</sup>South Australian Health and Medical Research Institute (SAHMRI), Laboratory for Human Neurophysiology and Genetics, Adelaide, SA, Australia

<sup>2</sup>Laboratory of Genetics, Salk Institute for Biological Studies, La Jolla, CA, USA

<sup>3</sup>Neural Aging Laboratory, Institute of Molecular Biology, CMBI, Leopold-Franzens-University Innsbruck, Tyrol, Austria

<sup>4</sup>Sagol Department of Neurobiology, Faculty of Natural Sciences, University of Haifa, Haifa, Israel

<sup>5</sup>Sorbonne Université, Institut du Cerveau - Paris Brain Institute - ICM, Inserm, CNRS, AP-HP, Hôpital de la Pitié Salpêtrière, DMU BioGeM, Paris, France

<sup>6</sup>Department of Stem Cell Biology, University Hospital Erlangen, Friedrich-Alexander University Erlangen-Nürnberg (FAU), Erlangen, Germany

<sup>7</sup>Center of Rare Diseases Erlangen (ZSEER), University Hospital Erlangen, FAU Erlangen-Nürnberg, Erlangen, Germany

<sup>8</sup>Department of Molecular Neurology, University Hospital Erlangen, FAU Erlangen-Nürnberg, Erlangen, Germany

<sup>9</sup>Flinders Health and Medical Research Institute, Flinders University, Adelaide, SA, Australia

### **\*Correspondence:**

Associate Professor Cedric Bardy. SAHMRI, Adelaide SA 5000, Australia.

Email: [cedric.bardy@sahmri.com](mailto:cedric.bardy@sahmri.com)

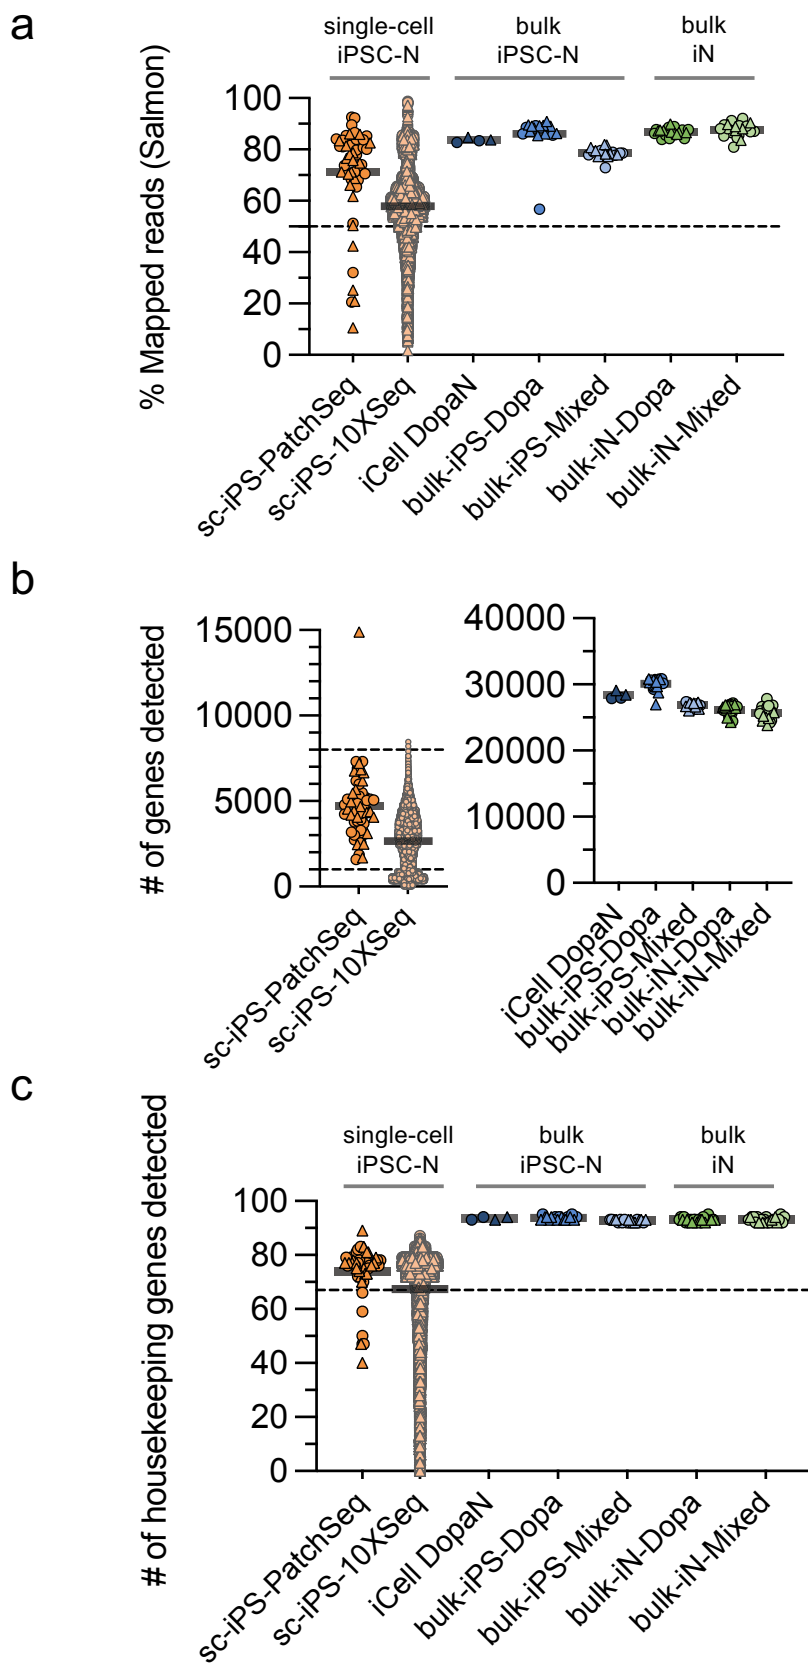

**Supplementary Figure 1.** Quality control metrics (percentage of mapped reads (a), number of genes detected (b) and number of housekeeping genes expressed (c)) for each single-cell or bulk RNA-seq library. Horizontal dotted lines indicate critical thresholds for sample inclusion/exclusion (refer to Methods for details).

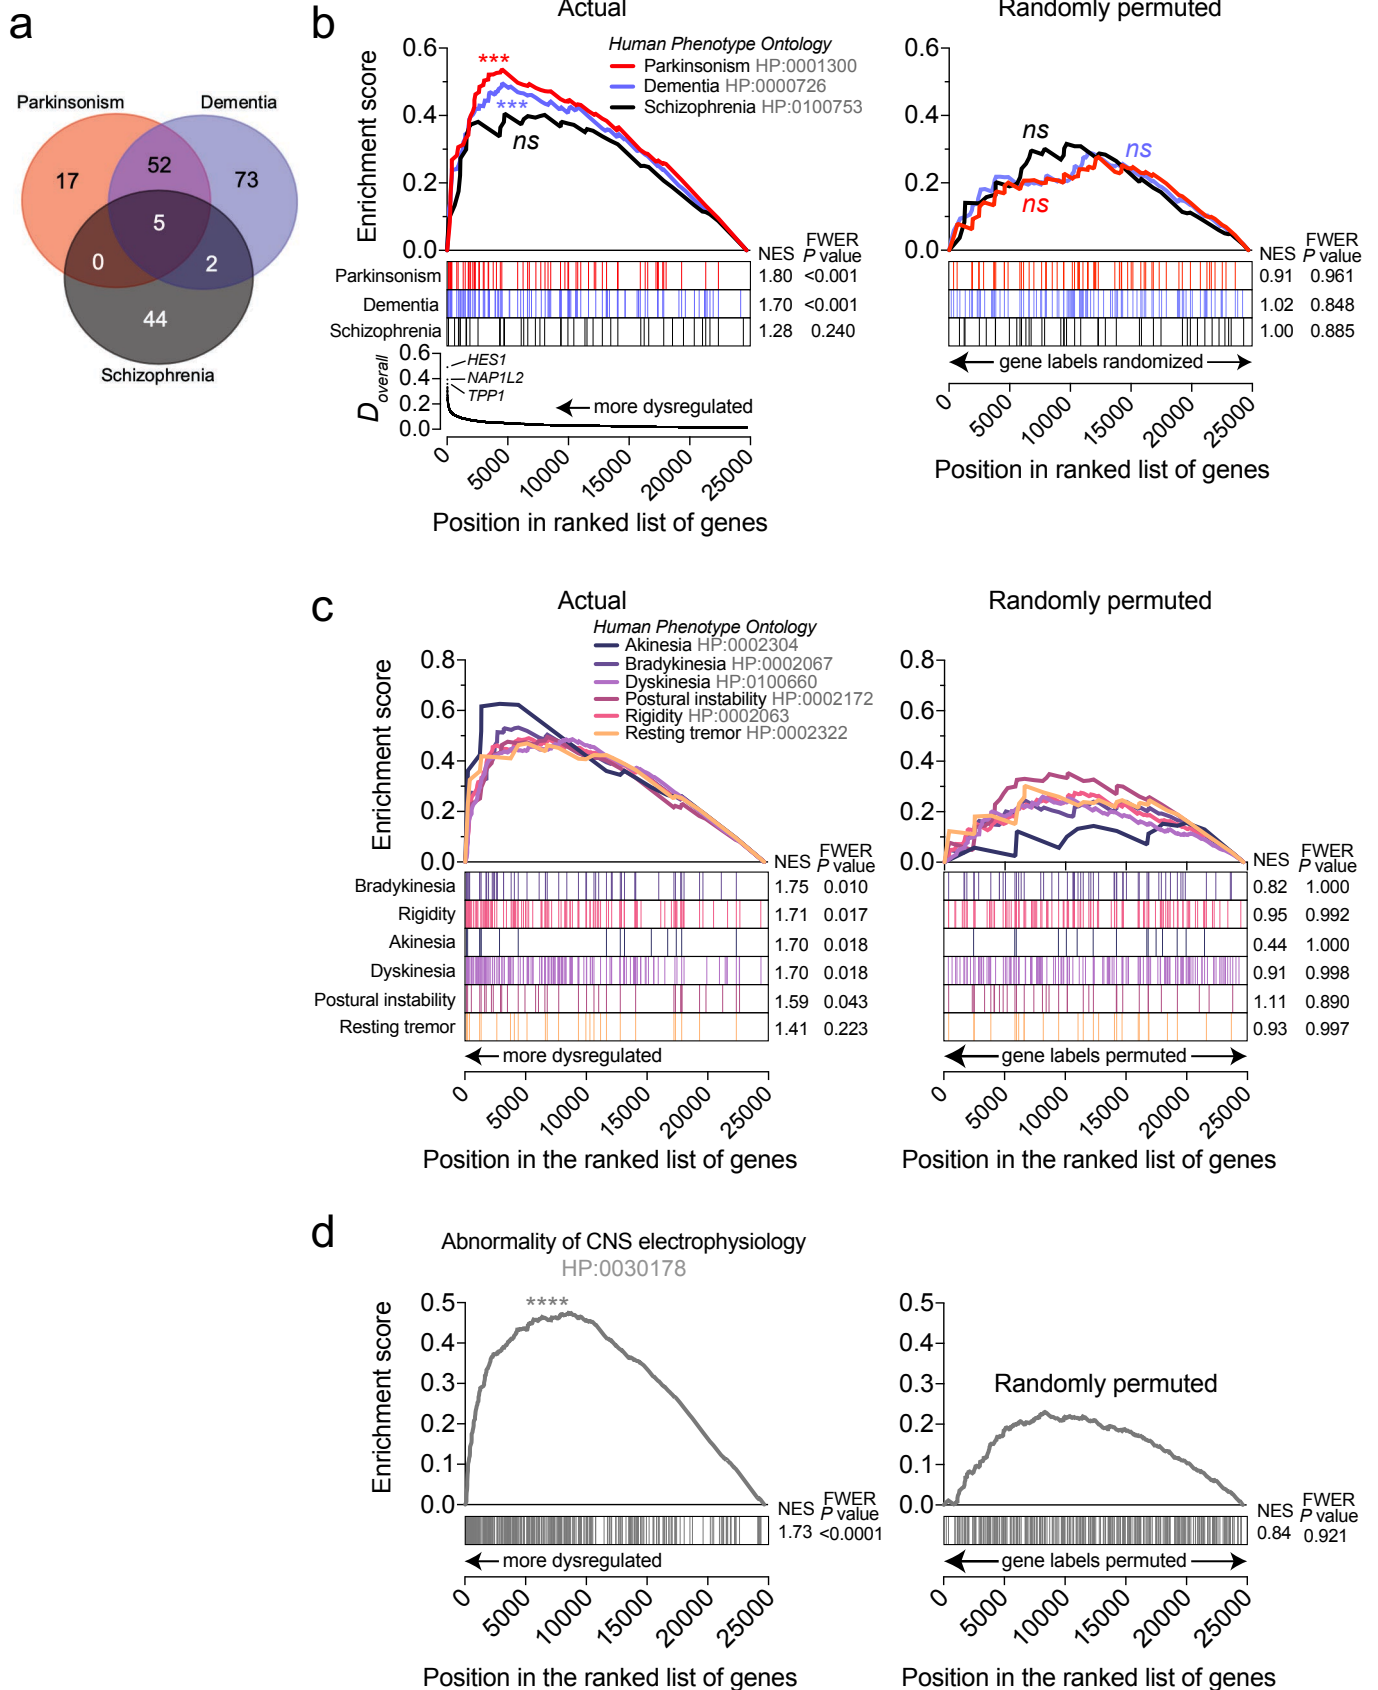

**Supplementary Figure 2.** **a** Venn analysis of genes annotated to the Human Phenotype Ontologies for Parkinsonism, Dementia and Schizophrenia reveals substantial overlap between parkinsonism and dementia genes. **b-d** Significant associations of the dysregulated PD transcriptome with Parkinsonism (**b**), PD clinical symptoms ontology (**c**) and abnormality of central nervous system electrophysiology (**d**) is completely abolished upon random permutation of gene labels, effectively destroying the gene-dysregulation score relationship.
