# Supplementary material for: Druggable transcriptomic pathways revealed in Parkinson’s patient-derived midbrain neurons
Source: NPJ Parkinsons Dis. 2022 Oct 18;8:134. doi: 10.1038/s41531-022-00400-0 (PMC9579158; doi:10.1038/s41531-022-00400-0)
Supplement: Supplementary file 9 — Supplementary Table 8 [file 41531_2022_400_MOESM9_ESM.pdf]

|                                                                                                                                                                                      |            |            |     |            |       |
|--------------------------------------------------------------------------------------------------------------------------------------------------------------------------------------|------------|------------|-----|------------|-------|
| CLEAR ENVELOPE REASSEMBLY%GOBP%GO:003144                                                                                                                                             | 0.31296876 | 0.8876207  | 18  | 0.9515566  | 11648 |
| HALLMARK_APOPTOSIS%MSIGDB_C2%HALLMARK_APOPTOSIS                                                                                                                                      | 0.24239094 | 0.85695447 | 111 | 0.9515689  | 6568  |
| NEGATIVE REGULATION OF ENDOCYTOSIS%GOBP%GO:0045806                                                                                                                                   | 0.25750932 | 0.8484871  | 50  | 0.9515783  | 11179 |
| PROTEIN LOCALIZATION TO PEROXISOME%GOBP%GO:0072662                                                                                                                                   | 0.25405    | 0.86418796 | 63  | 0.9515923  | 7116  |
| POSITIVE REGULATION OF GLYCOLYTIC PROCESS%GOBP%GO:0045821                                                                                                                            | 0.30067992 | 0.8611533  | 18  | 0.9515926  | 8098  |
| MITOCHONDRION LOCALIZATION%GOBP%GO:0051646                                                                                                                                           | 0.27008763 | 0.85543424 | 36  | 0.9516031  | 6322  |
| SEMAPHORIN-PLEXIN SIGNALING PATHWAY%GOBP%GO:0071526                                                                                                                                  | 0.27208236 | 0.8541774  | 56  | 0.951608   | 7434  |
| I-KAPPAB KINASE/NF-KAPPAB SIGNALING%GOBP%GO:0007249                                                                                                                                  | 0.25651392 | 0.853029   | 56  | 0.9516154  | 13587 |
| PROTEIN-CONTAINING COMPLEX LOCALIZATION%GOBP%GO:0031503                                                                                                                              | 0.23835614 | 0.85618234 | 217 | 0.9516204  | 5707  |
| REGULATION OF POSTTRANSCRIPTIONAL GENE SILENCING%GOBP%GO:0060147                                                                                                                     | 0.25377746 | 0.8616208  | 87  | 0.9516264  | 8514  |
| ALCOHOL BIOSYNTHETIC PROCESS%GOBP%GO:0046165                                                                                                                                         | 0.2552712  | 0.8618724  | 73  | 0.9516281  | 6121  |
| MITOCHONDRIAL TRANSLATIONAL TERMINATION%GOBP%GO:0070126                                                                                                                              | 0.24882573 | 0.8555397  | 89  | 0.9516376  | 6216  |
| MITOCHONDRIAL TRANSLATION TERMINATION%REACTOME%R-HSA-5419276.1                                                                                                                       | 0.25132298 | 0.8539007  | 88  | 0.95164216 | 6216  |
| WATER-SOLUBLE VITAMIN METABOLIC PROCESS%GOBP%GO:0006767                                                                                                                              | 0.25651127 | 0.85703385 | 69  | 0.95164603 | 10327 |
| LISSENCEPHALY GENE (LIS1) IN NEURONAL MIGRATION AND DEVELOPMENT%PATHWAY INTERACTION DATABASE NCI-NATURE CURATED DATA%LISSENCEPHALY GENE (LIS1) IN NEURONAL MIGRATION AND DEVELOPMENT | 0.515778   | 1.6113853  | 29  | 0.9516474  | 2466  |
| SIGNALING EVENTS MEDIATED BY STEM CELL FACTOR RECEPTOR (C-KIT)%PATHWAY INTERACTION DATABASE NCI-NATURE CURATED DATA%SIGNALING EVENTS MEDIATED BY STEM CELL FACTOR RECEPTOR (C-KIT)   | 0.2606988  | 0.8550346  | 48  | 0.9516521  | 9509  |
| POSITIVE REGULATION OF FILOPODIUM ASSEMBLY%GOBP%GO:0051491                                                                                                                           | 0.28166228 | 0.85477287 | 24  | 0.9516565  | 5930  |
| CELLULAR RESPONSE TO PROLIFERATING GROWTH FACTOR BETA STIMULUS%GOBP%GO:0071560                                                                                                       | 0.24624625 | 0.8542722  | 109 | 0.9516565  | 4704  |
| INTRACELLULAR LIPID TRANSPORT%GOBP%GO:009891                                                                                                                                         | 0.27145233 | 0.854666   | 34  | 0.9516672  | 4506  |
| BIOCARTA_EGF_PATHWAY%MSIGDB_C2%BIOCARTA_EGF_PATHWAY                                                                                                                                  | 0.29593718 | 0.85850984 | 22  | 0.9516694  | 9539  |
| REGULATION OF NEURON PROJECTION ARBORIZATION%GOBP%GO:0150011                                                                                                                         | 0.5238884  | 1.4581349  | 15  | 0.9516712  | 1301  |
| PID_BARD1_PATHWAY%MSIGDB_C2%PID_BARD1_PATHWAY                                                                                                                                        | 0.27980593 | 0.85589904 | 25  | 0.9516843  | 8740  |
| REGULATION OF NUCLEOTIDE CATABOLIC PROCESS%GOBP%GO:0030811                                                                                                                           | 0.26082116 | 0.86265266 | 67  | 0.9516872  | 8098  |
| REGULATION OF INTRINSIC APOPTOTIC SIGNALING PATHWAY IN RESPONSE TO DNA DAMAGE%GOBP%GO:1902229                                                                                        | 0.28136668 | 0.8562634  | 30  | 0.9517082  | 3654  |
| REGULATION OF EPIDERMIS DEVELOPMENT%GOBP%GO:0045682                                                                                                                                  | 0.26266198 | 0.8651173  | 46  | 0.9517093  | 6686  |
| TRK RECEPTOR SIGNALING MEDIATED BY THE MAPK PATHWAY%PATHWAY INTERACTION DATABASE NCI-NATURE CURATED DATA%TRK RECEPTOR SIGNALING MEDIATED BY THE MAPK PATHWAY                         | 0.26960022 | 0.85487056 | 34  | 0.9517138  | 12437 |
| TP53 REGULATES TRANSCRIPTION OF GENES INVOLVED IN CYTOCHROME C RELEASE%REACTOME%R-HSA-6803204.1                                                                                      | 0.5146816  | 1.4676578  | 19  | 0.9517207  | 4030  |
| POTASSIUM ION TRANSPORT%GOBP%GO:0006813                                                                                                                                              | 0.24276403 | 0.8482642  | 116 | 0.9517276  | 7418  |
| SERINE FAMILY AMINO ACID METABOLIC PROCESS%GOBP%GO:0009069                                                                                                                           | 0.27529263 | 0.8666858  | 36  | 0.95172966 | 4354  |
| SUMOYLATION OF UBIQUITYNYLATION PROTEINS%REACTOME%R-HSA-3232142.3                                                                                                                    | 0.27631697 | 0.8652103  | 35  | 0.95173514 | 4996  |
| NEGATIVE REGULATION OF TRANSMEMBRANE RECEPTOR PROTEIN SERINE/THREONINE KINASE SIGNALING PATHWAY%GOBP%GO:0090101                                                                      | 0.24771997 | 0.8543534  | 96  | 0.9517385  | 7534  |
| REGULATION OF EPITHELIAL CELL PROLIFERATION%GOBP%GO:0050678                                                                                                                          | 0.23899081 | 0.8562396  | 212 | 0.9517435  | 7352  |
| REGULATION OF GLUCOSE TRANSMEMBRANE TRANSPORT%GOBP%GO:0010827                                                                                                                        | 0.26699936 | 0.86337227 | 44  | 0.95174617 | 8214  |
| RELEASE 75%5625886                                                                                                                                                                   | 0.2895316  | 0.8642274  | 24  | 0.9517501  | 3656  |
| REGULATION OF MONONUCLEAR CELL MIGRATION%GOBP%GO:0071675                                                                                                                             | 0.27276936 | 0.8616752  | 34  | 0.9517502  | 11417 |
| PROTEIN-LIPID COMPLEX REMODELING%GOBP%GO:0034368                                                                                                                                     | 0.29901853 | 0.8583339  | 19  | 0.9517505  | 8196  |
| POSITIVE REGULATION OF PHOSPHATIDYLINOSITOL 3-KINASE SIGNALING%GOBP%GO:0014068                                                                                                       | 0.256062   | 0.8573332  | 63  | 0.9517634  | 9785  |
| TUBE CLOSURE%GOBP%GO:0060606                                                                                                                                                         | 0.2732563  | 0.8611814  | 34  | 0.95177466 | 13223 |
| BIOCARTA_GSK3_PATHWAY%MSIGDB_C2%BIOCARTA_GSK3_PATHWAY                                                                                                                                | 0.35557605 | 1.4696457  | 16  | 0.9517965  | 4020  |
| IMPORT ACROSS PLASMA MEMBRANE%GOBP%GO:0098739                                                                                                                                        | 0.25346452 | 0.85856664 | 96  | 0.9518014  | 10244 |
| RETINOID METABOLISM AND TRANSPORT%REACTOME%R-HSA-975634.2                                                                                                                            | 0.27913573 | 0.86076955 | 35  | 0.9518018  | 4090  |
| PHOSPHOLIPID DEPHOSPHORYLATION%GOBP%GO:0046839                                                                                                                                       | 0.27360468 | 0.86054474 | 37  | 0.9518085  | 6928  |
| SIGNALING BY TRYPTOPHAN%REACTOME%R-HSA-166520.4                                                                                                                                      | 0.24681298 | 0.85717001 | 125 | 0.9518098  |       |























|                                                                                                                     |            |           |    |   |      |
|---------------------------------------------------------------------------------------------------------------------|------------|-----------|----|---|------|
| COMPLEMENT AND COAGULATION CASCADES%WIKIPATHWAYS_20210110%WP558%HOMO SAPIENS                                        | 0.51096547 | 1.5988224 | 32 | 1 | 3934 |
| PID_UPA_UPAR_PATHWAY%MSIGDB_C2%PID_UPA_UPAR_PATHWAY                                                                 | 0.5644022  | 1.5974187 | 19 | 1 | 2466 |
| HOMOTYPIC CELL-CELL ADHESION%GOBP%GO:0034109                                                                        | 0.4910166  | 1.5916495 | 39 | 1 | 5295 |
| HALLMARK_NOTCH_SIGNALING%MSIGDB_C2%HALLMARK_NOTCH_SIGNALING                                                         | 0.5442772  | 1.5904169 | 21 | 1 | 357  |
| HIPPO SIGNALING%GOBP%GO:0035329                                                                                     | 0.5224672  | 1.5894673 | 26 | 1 | 4685 |
| ENDOTHELIN PATHWAYS%WIKIPATHWAYS_20210110%WP2197%HOMO SAPIENS                                                       | 0.52423495 | 1.5892973 | 25 | 1 | 5524 |
| CELL JUNCTION MAINTENANCE%GOBP%GO:0034331                                                                           | 0.570698   | 1.5847397 | 15 | 1 | 5877 |
| REGULATION OF MITOCHONDRIAL OUTER MEMBRANE PERMEABILIZATION INVOLVED IN APOPTOTIC SIGNALING PATHWAY%GOBP%GO:1901028 | 0.50062716 | 1.5840766 | 41 | 1 | 4317 |
| T CELL ACTIVATION INVOLVED IN IMMUNE RESPONSE%GOBP%GO:002286                                                        | 0.54420745 | 1.5840503 | 20 | 1 | 1876 |
| PYRIMIDINE-CONTAINING COMPOUND CATABOLIC PROCESS%GOBP%GO:0072529                                                    | 0.5064638  | 1.5678614 | 31 | 1 | 4743 |
| NEGATIVE REGULATION OF MITOCHONDRION ORGANIZATION%GOBP%GO:0010823                                                   | 0.49555945 | 1.5655676 | 39 | 1 | 2885 |
| PID_RHOA_REG_PATHWAY%MSIGDB_C2%PID_RHOA_REG_PATHWAY                                                                 | 0.49877688 | 1.5646584 | 36 | 1 | 4426 |
